# Supplementary material for: The Transcription Factors WRKY41 and WRKY53 Mediate Early Flowering Induced by the Novel Plant Growth Regulator Guvermectin in Arabidopsis thaliana
Source: MDPI journal article supplement (doi:10.3390/ijms24098424), 2023-05-08
Supplement: s1 [file s1]

## Supplementary Table 1

Table S1 Flowering time of various plants in this study.

| Genotype                                                                                                                                           | Days to flowering | Rosette leaf number |
|----------------------------------------------------------------------------------------------------------------------------------------------------|-------------------|---------------------|
| Long-day conditions                                                                                                                                |                   |                     |
| Col-0(WT)                                                                                                                                          | 25.3±0.9          | 12.0±0.6            |
| <i>wrky41</i>                                                                                                                                      | 25.2±0.8          | 12.1±0.5            |
| <i>35S:WRKY41-1</i>                                                                                                                                | 20.6±1.1          | 9.4±0.8             |
| <i>35S:WRKY41-2</i>                                                                                                                                | 20.4±1.1          | 9.4±0.7             |
| <i>wrky53</i>                                                                                                                                      | 25.7±0.7          | 11.9±0.6            |
| <i>35S:WRKY53-1</i>                                                                                                                                | 21.1±0.9          | 9.3±0.7             |
| <i>35S:WRKY53-2</i>                                                                                                                                | 20.9±0.7          | 9.5±0.6             |
| <i>w41/w53-1</i>                                                                                                                                   | 28.7±0.8          | 13.3±0.7            |
| <i>w41/w53-2</i>                                                                                                                                   | 28.6±0.7          | 13.8±0.7            |
| <i>soc1</i>                                                                                                                                        | 39.2±1.7          | 21.3±1.0            |
| <i>lfy</i>                                                                                                                                         | 26.1±0.8          | 11.7±0.6            |
| <i>35S:WRKY41-lfy</i>                                                                                                                              | 26.0±0.7          | 11.9±0.5            |
| <i>35S:WRKY41-soc1</i>                                                                                                                             | 38.4±0.7          | 22.1±0.8            |
| <i>ahk2/3</i>                                                                                                                                      | 26.0±0.5          | 12.1±0.7            |
| <i>ahk2/4</i>                                                                                                                                      | 26.1±0.6          | 12.2±0.7            |
| <i>ahk3/4</i>                                                                                                                                      | 26.1±0.8          | 12.4±0.6            |
| <i>35S:WRKY61-1</i>                                                                                                                                | 25.5±1.1          | 12.0±0.5            |
| <i>35S:WRKY61-2</i>                                                                                                                                | 25.1±1.1          | 11.9±0.6            |
| GV treatment                                                                                                                                       |                   |                     |
| Col-0 (WT)                                                                                                                                         | 21.4±1.3          | 9.9±0.7             |
| <i>wrky41</i>                                                                                                                                      | 23.3±0.9          | 11.8±0.6            |
| <i>wrky53</i>                                                                                                                                      | 22.9±1.0          | 12.0±0.5            |
| <i>w41/w53-1</i>                                                                                                                                   | 28.2±0.7          | 13.7±0.7            |
| <i>w41/w53-2</i>                                                                                                                                   | 28.4±0.7          | 13.9±0.9            |
| <i>soc1</i>                                                                                                                                        | 39.1±1.8          | 21.6±0.9            |
| <i>lfy</i>                                                                                                                                         | 25.8±0.7          | 11.8±0.5            |
| <i>ahk2/3</i>                                                                                                                                      | 22.2±0.7          | 9.4±0.7             |
| <i>ahk2/4</i>                                                                                                                                      | 21.9±0.8          | 9.4±0.8             |
| <i>ahk3/4</i>                                                                                                                                      | 22.1±0.8          | 9.3±0.8             |
| Short-day conditions                                                                                                                               |                   |                     |
| Col-0 (WT)                                                                                                                                         | 66.4±0.9          | 46.0±0.9            |
| GV treatment                                                                                                                                       |                   |                     |
| Col-0 (WT)                                                                                                                                         | 58.1±1.0          | 39.8±1.1            |
| Flowering time is presented as the days to flowering and the rosette leaf number. Values are mean ± SD. from at least 45 plants for each genotype. |                   |                     |

## Supplementary Table 2

Table S2 The transcription factors induced by GV.( log2FoldChange>1.5)

| Gene id | Locus Names | Gene_name | log2FoldChange |
|---------|-------------|-----------|----------------|
| 838467  | At1g18860   | WRKY61    | 4.154944       |
| 826708  | At4g11070   | WRKY41    | 3.284362       |
| 816726  | At2g21900   | WRKY59    | 3.129090       |
| 831147  | At5g13080   | WRKY75    | 2.731508       |
| 819248  | At2g46400   | WRKY46    | 2.033432       |
| 836602  | At5g64810   | WRKY51    | 1.943350       |
| 844423  | At1g80840   | WRKY40    | 1.834195       |
| 825775  | At4g04450   | WRKY42    | 1.790545       |
| 831826  | At5g10900   | WRKY62    | 1.741529       |
| 844398  | At1g80590   | WRKY66    | 1.729935       |
| 818669  | At2g40740   | WRKY55    | 1.645343       |
| 828481  | At4g23810   | WRKY53    | 1.632624       |
| 825435  | At3g62610   | MYB11     | 5.033301       |
| 842957  | At1g66390   | MYB90     | 3.881552       |
| 842955  | At1g66370   | MYB113    | 3.755247       |
| 819332  | At2g47190   | MYB2      | 3.125961       |
| 839219  | At1g26780   | MYB117    | 2.755653       |
| 821904  | At3g23250   | MYB15     | 2.194089       |
| 841218  | At1g48000   | MYB112    | 1.773851       |
| 843804  | At1g69020   | MYB31     | 1.645950       |
| 818902  | At2g43000   | NAC042    | 3.159705       |
| 832299  | At5g22380   | NAC090    | 2.588656       |
| 841722  | At1g52890   | NAC019    | 2.131126       |
| 819562  | At3g04070   | NAC047    | 1.908843       |
| 840317  | At1g34180   | NAC016    | 1.699634       |
| 816209  | At2g17040   | NAC036    | 1.607708       |

|        |           |        |          |
|--------|-----------|--------|----------|
| 820512 | At3g13220 | ABCG26 | 4.988130 |
| 825269 | At3g60970 | ABCC15 | 3.993031 |
| 821902 | At3g23240 | ERF1   | 3.880447 |
| 835447 | At5g53660 | GRF7   | 1.624781 |

### Supplementary Table 3

Table S3 List of primers used in the experiments.

| Primer      | 5'-----3'                |
|-------------|--------------------------|
| qPCR primer |                          |
| UBQ10-F     | CACACTCCACTTGGTCTTGCGT   |
| UBQ10-R     | TGGTCTTTCCGGTGAGAGTCTTCA |
| GI-F        | AGTCGTTGCTTATGTTGA       |
| GI-R        | GCTTCTCAGTTGATGGAT       |
| FT-F        | CTACAACTGGAACAACCTT      |
| FT-R        | AACACGACACGATGAATT       |
| CO-F        | ATAGAGTTGTTCCGCTTA       |
| CO-R        | ATTGTCGTTGTAGTGAGT       |
| TSF-F       | ATTCATCGTATTGTGTTG       |
| TSF-R       | AAGACCAAGATTGTAGAT       |
| SOC1-F      | ATGAAGAGAATAGAGAATG      |
| SOC1-R      | TTAGTATGCCTCAGATAA       |
| LFY-F       | AGATAGCGGAGTTAGGTT       |
| LFY-R       | GACTATTCATCATCTCTTCAAG   |
| AP1-F       | AAGAGGATAGAGAACAAG       |
| AP1-R       | AAGAATCAGTGGAGTATT       |
| WRKY41-F    | CAGCTTCAGGGTTCGTCTTC     |
| WRKY41-R    | ATCAGGCGCAAGCTCTATCG     |

---

|            |                          |
|------------|--------------------------|
| WRKY53-F   | GACGGGGATGCTACGGTTT      |
| WRKY53-R   | TTTTGGGTAATGGCTGGTTTG    |
| WRKY61-F   | GTGCAGCTTACGGCAACATT     |
| WRKY61-R   | GGATCGAAAGATGACCCGGC     |
| WRKY59-F   | TCACAAGTGTTTCGAGCCCAG    |
| WRKY59-R   | CAGAAGGGCTTGGGTGGTTA     |
| WRKY46-F   | CATCACATCCCCGAAGACGA     |
| WRKY46-R   | TTCGGACTTGGTCGGTTTCA     |
| WRKY75-F   | ATATGGCCAAAAGGCCGTCA     |
| WRKY75-R   | TGCTCGAAGTTTTTCGGTGGA    |
| WRKY55-F   | GTCGTCTCAAGGAACGGAGG     |
| WRKY55-R   | AGCGCCGGATCTTTCTACTG     |
| WRKY66-F   | AGACCATCAAAACCTCTCCGC    |
| WRKY66-R   | TCGCAGTTTTGGTCTTTCGC     |
| WRKY62-F   | CAACCCCGATCTACCACGAC     |
| WRKY62-R   | CTGGTCCTTGGTGTAGGCAC     |
| WRKY42-F   | GTCCTGTTCGCAAGCAAGTG     |
| WRKY42-R   | ATGTTCATAGCCGCAGGAGG     |
| WRKY40-F   | AACCGCCACATCTCTCATGG     |
| WRKY40-R   | TGGGCTCGTCACTTTCTTCG     |
| WRKY51-F   | ACGGGTCATCGAGTTGCATT     |
| WRKY51-R   | TCACCGAGCAACCTTCACTT     |
| FLC-F      | GGCTAGCCAGATGGAGAATAATCA |
| FLC-R      | CACCGGAAGATTGTCGGAGA     |
| TFL1-F     | CCAAGGCCAAGCATAGGGAT     |
| TFL1-R     | CCAAGATCATACTCGACCGCA    |
| BCS1-F     | GAGATCAAAGAGCACCGCCT     |
| BCS1-R     | AGGCACACATGGAAGACGTT     |
| CYP703A2-F | AGGCACACATGGAAGACGTT     |

---

---

|                             |                                 |
|-----------------------------|---------------------------------|
| CYP703A2-R                  | CGGTTGCTTGATCGCTTCAG            |
| ERF1-F                      | CCAGGACACGGGGAAGTATG            |
| ERF1-R                      | TCACAGTTTCACCAGTCGCA            |
| JRG21-F                     | TGACCATTCTCTTGCCGGAC            |
| JRG21-R                     | ATGGAAAATAAAACAGTCACCTGAA       |
| LBD1-F                      | ACTATTGCACACCGCGTCTT            |
| LBD1-R                      | GGCACCTGCACATCCATACA            |
| PR1-F                       | ACGCAGAACAACCTAAGAGGCA          |
| PR1-R                       | ACCCCAGGCTAAGTTTTCCC            |
| Mutant verification primer  |                                 |
| LBa1.3                      | ATTTTGCCGATTTTCGGAAC            |
| <i>wrky41</i> -LP           | GAAAGGTTCCAGGATCTCCAG           |
| <i>wrky41</i> -RP           | GGGGAAGCCTGTGTTAATCTC           |
| <i>wrky53</i> -LP           | TCAGGCACGACTTAGAGAAGC           |
| <i>wrky53</i> -RP           | GGGAAAGTTGTGTCAATCTCG           |
| CRISPR-Cas9 guide oligo     |                                 |
| LFY-oligo 1                 | GATTGAGACGATTGCAAGAAGAGG        |
| LFY-oligo 2                 | AAACCCTCTTCTTGCAATCGTCTC        |
| WRKY41-oligo 1              | GATTGTCTCAACAAATACTTCCAC        |
| WRKY41-oligo 2              | AAACGTGGAAGTATTTGTTGAGAC        |
| WRKY53-oligo 1              | GATTGGCCATTACCCAAAAGCCAA        |
| WRKY53-oligo 2              | AAACTTGGCTTTTGGGTAATGGCC        |
| SOC1-oligo 1                | GATTGAGTGACTTTCTCCAAAAGA        |
| SOC1-oligo 2                | AAACTCTTTTGGAGAAAGTCACTC        |
| CRISPR-Cas9 sequence primer |                                 |
| WRKY41-F                    | GATCCCACTTCCAGAGAAACGAGAAAC     |
| WRKY41-R                    | TTAATCTCAAGAATATTCAATACTGTACTAC |
| LFY-F                       | GACTTGGTGGTTTAGAGGGACTATT       |
| LFY-R                       | GAAAGTCGGG CATAGAAATGTTGAGAA    |

---

---

|                        |                                                         |
|------------------------|---------------------------------------------------------|
| WRKY53-F               | CAGATGCACACATCGTAGCACACAAA                              |
| WRKY53-R               | CTCTCGCTGATCATTACTTACTAGTTACT                           |
| SOC1-F1                | ACCTACTCTCTTTGATTCATATATGAAATG                          |
| SOC1-R1                | ATAAGAGGGTATATGTACTTGATACTAC                            |
| GST tag protein primer |                                                         |
| WRKY53-F               | CGGAATTC ATGTTACCAAAGTGGTCAGA                           |
| WRKY53-R               | CCGCTCGAGTTATGGCTTT TGGGTAATGG                          |
| WRKY41-F               | ACGCGTCGACCGATGTTGCCAAAGTGGACA<br>GAG                   |
| WRKY41-R               | CCGCTCGAGTTAGGCCCTGAGATTCTGGT                           |
| EMSA primer            |                                                         |
| EMSA-LFY-1-F           | GAAACTGAGGGAGTGAGACAGTCAAAATA<br>AAACAGACTGAGAGCA       |
| EMSA-LFY-1-R           | TGCTCTCAGTCTGTTTTATTTTGACTGTCTCA<br>CTCCCTCAGTTTC       |
| EMSA-LFY-2-F           | TCTTTCTGTTATTTAATAAATTTGACATTAC<br>CAAAAAAAAAAATTT      |
| EMSA-LFY-2-R           | AAATTTTTTTTTTTGGTAATGTCAAATTTATT<br>AAATAACAGAAAGA      |
| EMSA-LFY-3-F           | TTTATATTCCTACGTGTCAAATTATGAATGG<br>TCATAATCAGAGTAGAGAA  |
| EMSA-LFY-3-R           | TTCTCTACTCTGATTATGACCATTTCATAATT<br>TGACACGTAGGAATATAAA |
| EMSA-LFY-4-F           | TGTCGATGAAAGAAAAAGTTTGACTTGTTA<br>AGTCCCAACTGTC         |
| EMSA-LFY-4-R           | GACAGTTGGGACTTAACAAGTCAAACCTTTT<br>TCTTTCATCGACA        |
| EMSA-LFY-5-F           | ACTTGTTAAGTCCCAACTGTCAATTTCCCAG<br>CAAGACACAT           |

---

---

|                |                                               |
|----------------|-----------------------------------------------|
| EMSA-LFY-5-R   | ATGTGTCTTGCTGGGAAATTGACAGTTGGG<br>ACTTAACAAGT |
| EMSA-SOC1- F   | TGAAAGGAGGTTGCATCCTTCA                        |
| EMSA-SOC1- R   | GGTAGATCAATGGTGCAACCA                         |
| EMSA-SOC1-CK-F | ACACACAAATAGATGAAACGAGG                       |
| EMSA-SOC1-CK-R | CGATTGGCTAAAAGGGTTTGATA                       |
| Luc primer     |                                               |
| SOC1-Luc-F     | AAC TGCAGCCTGAAGCATAGCCTGGTTCTA               |
| SOC1-Luc-R     | CGGGATCCTCAATGGTGCAACCACCTCA                  |
| LFY-Luc-F      | AAC TGCAGTGTGAAAATGATACTGAGAAAA<br>TAGG       |
| LFY-Luc-R      | CGGGATCCTGTAAAAATGACCACTCGAGCA<br>AC          |
| W41-SK-F       | GCTCTAGAATGTTGCCAAAGTGGACAGAG                 |
| W41-SK-R       | CGGAATTCTTAGGCCCTGAGATTCTGGT                  |
| W53-SK-F       | GCTCTAGAATGTTACCAAAGTGGTCAGA                  |
| W53-SK-R       | CGGAATTCTTATGGCTTTTGGGTAATGG                  |

---
